# Supplementary material for: A quantitative reference transcriptome for Nematostella vectensis early embryonic development: a pipeline for de novo assembly in emerging model systems
Source: PubMed Central journal article supplement (PMC3748831; doi:10.1186/2041-9139-4-16), 2013-06-03

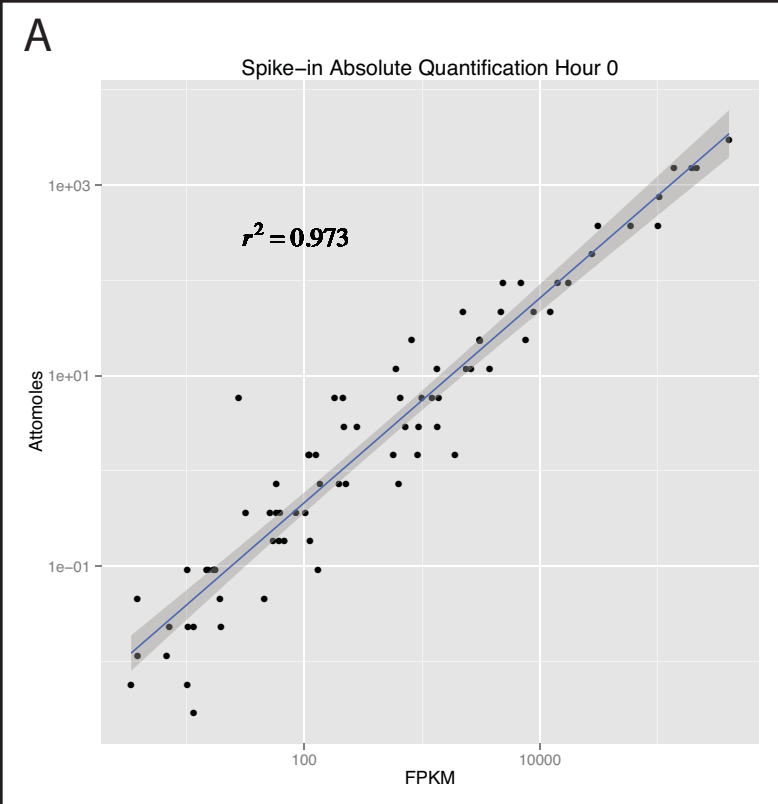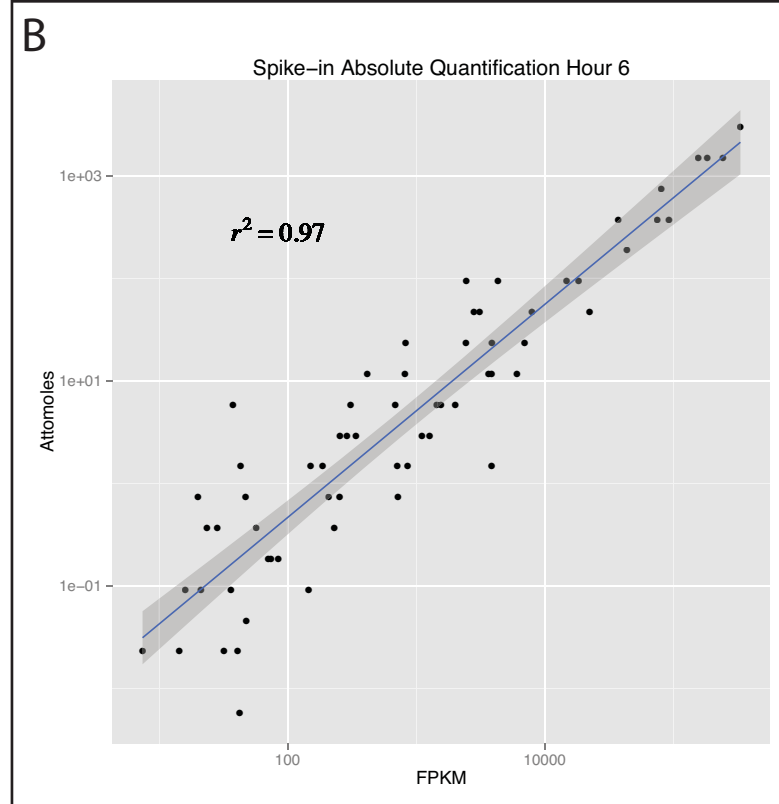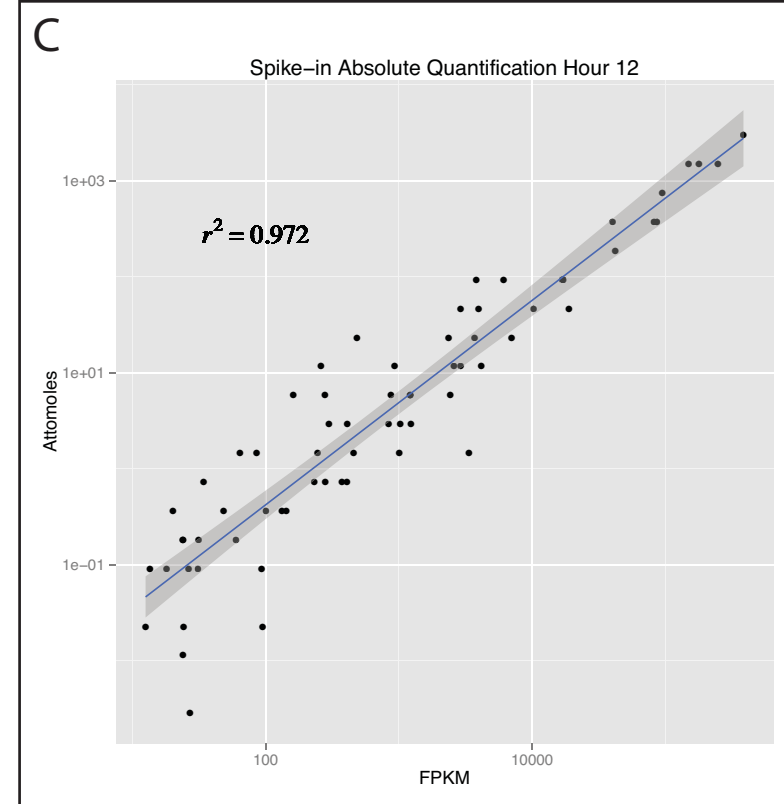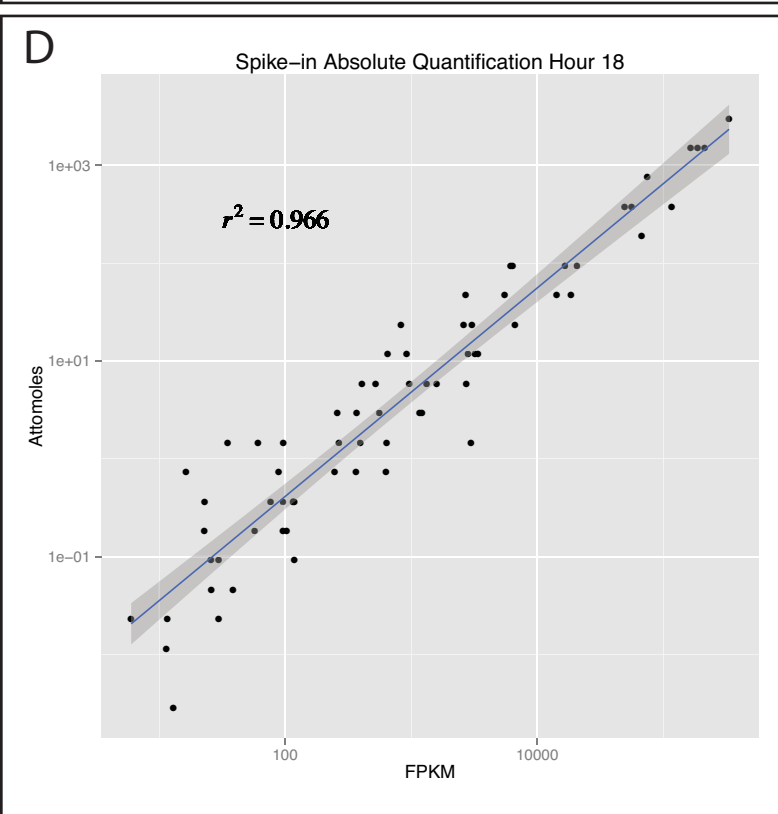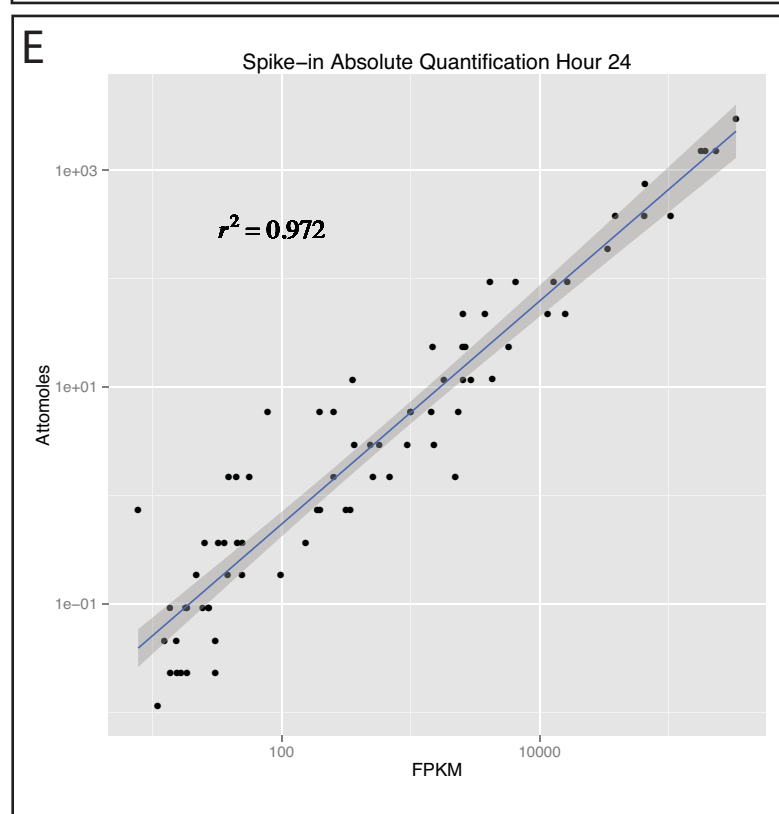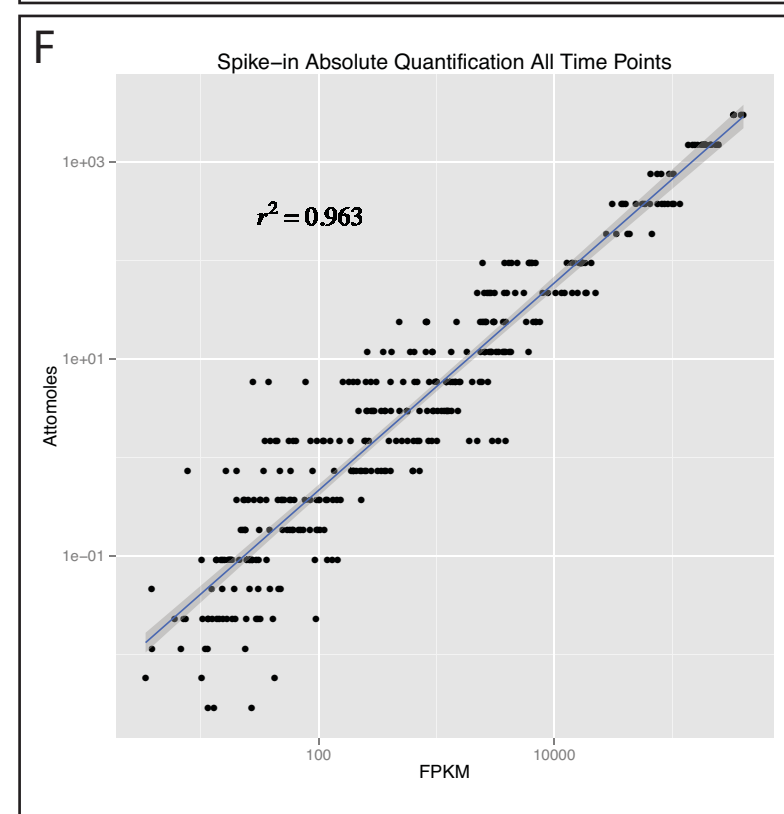

Supplement: 2041-9139-4-16-S3.pdf [file 2041-9139-4-16-S3.pdf]
